# Supplementary material for: Sexual Dimorphism in White Matter Developmental Trajectories Using Tract-Based Spatial Statistics
Source: PubMed Central journal article supplement (PMC4744889; doi:10.1089/brain.2015.0340), 2016-02-01
Supplement: Supp_Figure2.pdf [file Supp_Figure2.pdf]

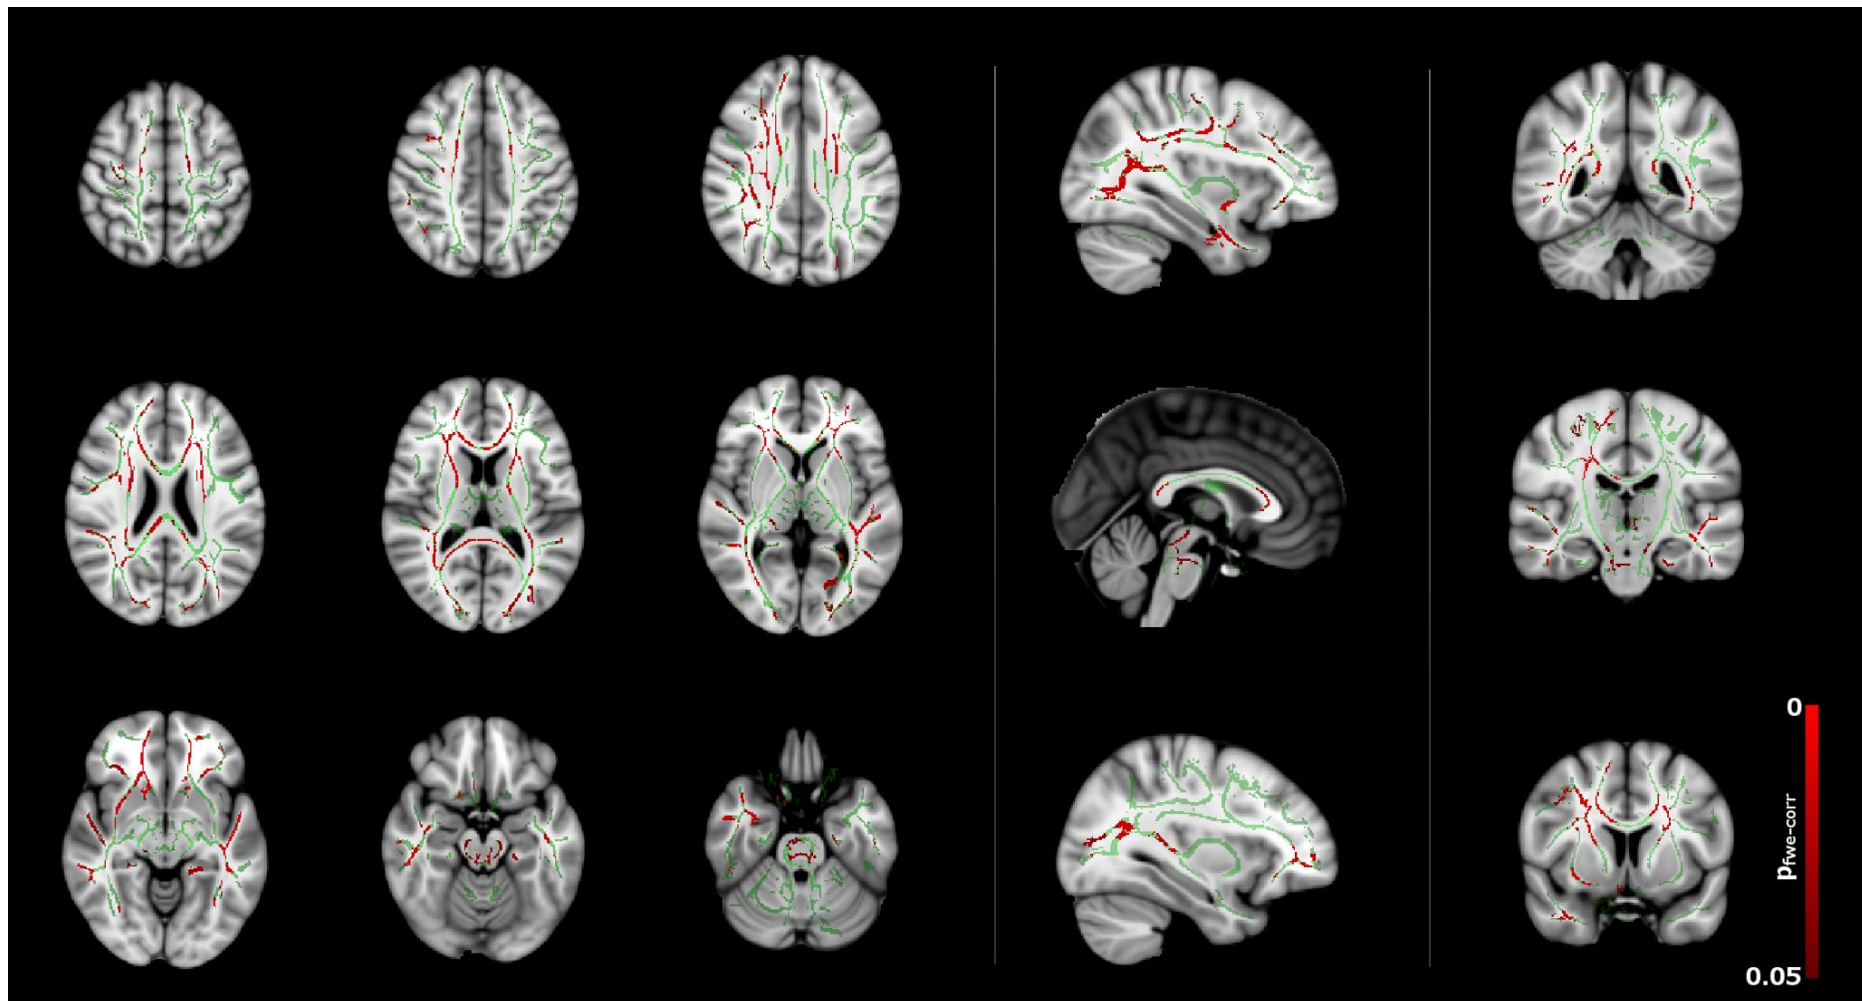

**Supplementary Figure 2:** Group differences in  $\lambda_{\text{radial}}$  between male and female subjects ( $p < 0.05$ , corrected), corrected for age, total brain volume and FSIQ. Red regions indicate a significantly higher  $\lambda_{\text{radial}}$  in males than females.
