# Supplementary material for: Sexual Dimorphism in White Matter Developmental Trajectories Using Tract-Based Spatial Statistics
Source: PubMed Central journal article supplement (PMC4744889; doi:10.1089/brain.2015.0340), 2016-02-01
Supplement: Supp_Figure3-12.pdf [file Supp_Figure3-12.pdf]

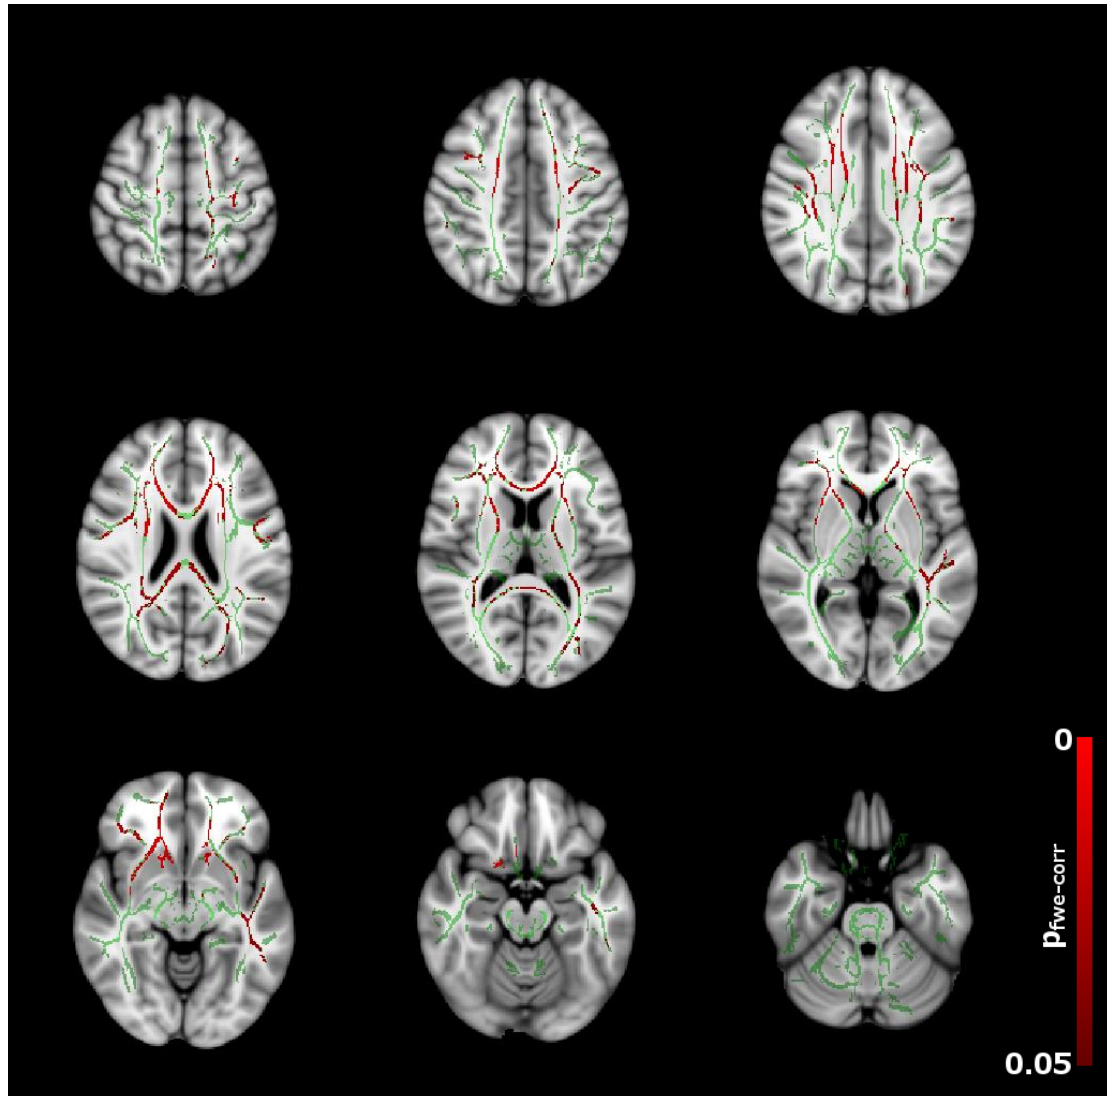

**Supplementary Figure 3:** Group differences in MD between male and female subjects ( $p < 0.05$ , corrected) in the 8-13 age range, corrected for age, total brain volume and FSIQ. Red regions indicate a significantly higher MD in males than females. Corresponds to figure 1 in the main text (8-16 age range).

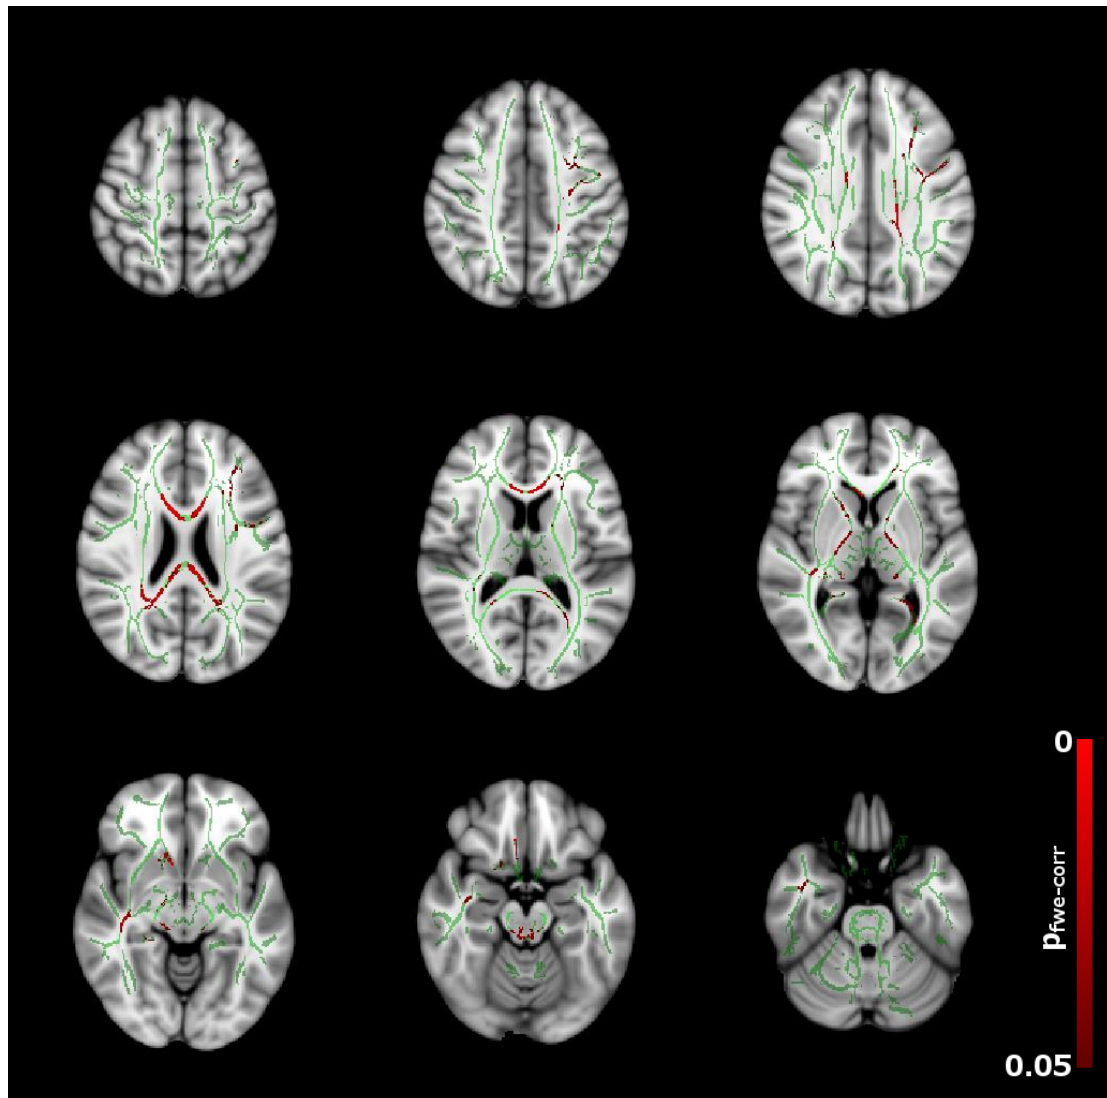

**Supplementary Figure 4:** Group differences in  $\lambda_{\text{axial}}$  between male and female subjects ( $p < 0.05$ , corrected) in the 8-13 age range, corrected for age, total brain volume and FSIQ. Red regions indicate a significantly higher  $\lambda_{\text{axial}}$  in males than females. Corresponds to figure 2 in the main text (8-16 age range).

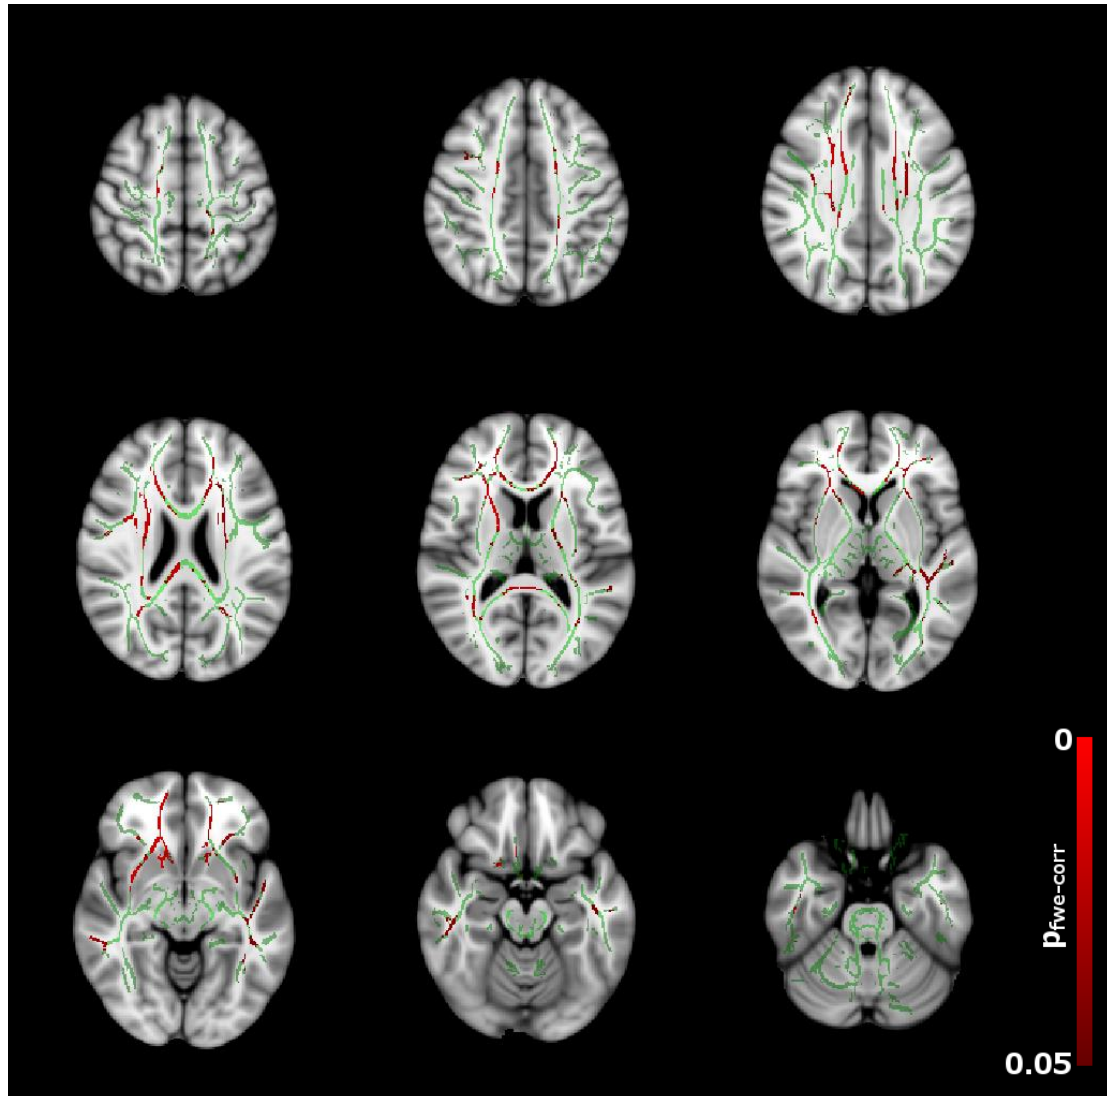

**Supplementary Figure 5:** Group differences in  $\lambda_{\text{radial}}$  between male and female subjects ( $p < 0.05$ , corrected) in the 8-13 age range, corrected for age, total brain volume and FSIQ. Red regions indicate a significantly higher  $\lambda_{\text{radial}}$  in males than females. Corresponds to figure 3 in the main text (8-16 age range).

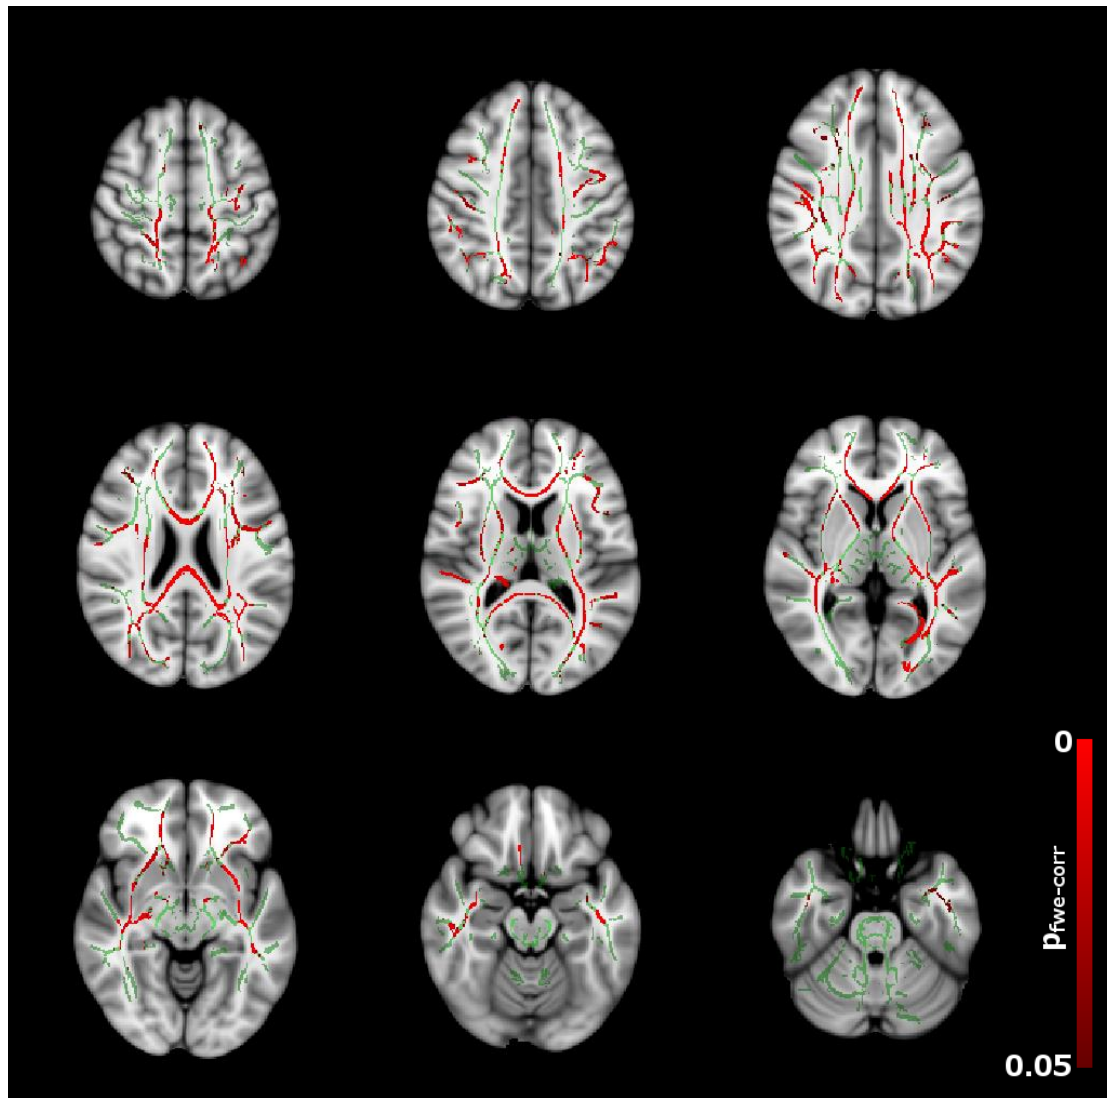

**Supplementary Figure 6:** Age-gender interactions in FA between male and female subjects ( $p < 0.05$ , corrected) in the 8-13 age range, corrected for total brain volume and FSIQ. Red regions indicate a significantly steeper slope in males than females. No significant difference was seen in the 8-16 age range, although several regions were close to significance ( $p < 0.1$ )

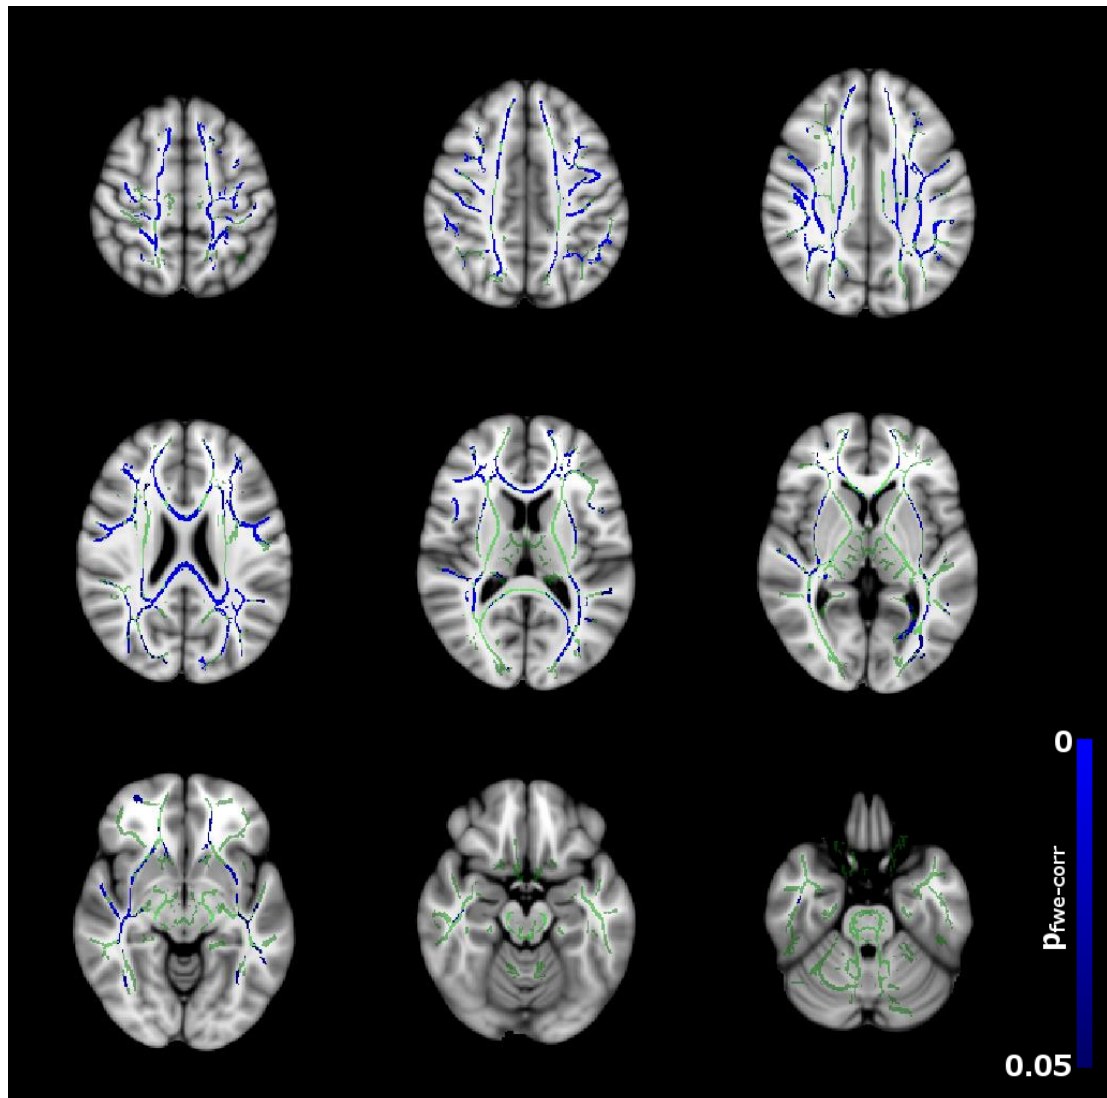

**Supplementary Figure 7:** Age-gender interactions in MD between male and female subjects ( $p < 0.05$ , corrected) in the 8-13 age range, corrected for total brain volume and FSIQ. Blue regions indicate a significantly steeper negative slope in males than females. Corresponds to figure 4 in the main text (8-16 age range).



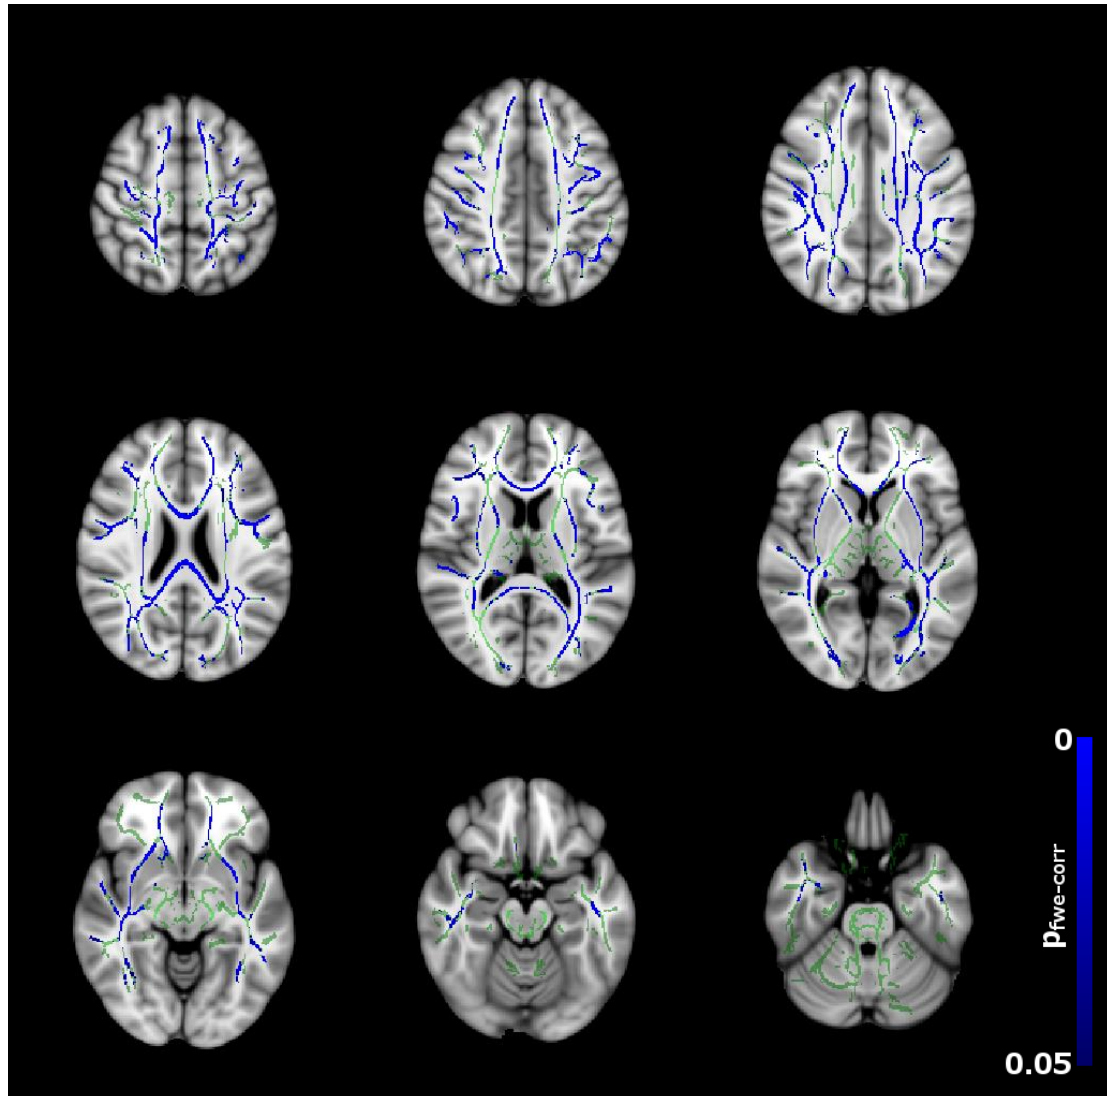

**Supplementary Figure 8:** Age-gender interactions in  $\lambda_{\text{radial}}$  between male and female subjects ( $p < 0.05$ , corrected) in the 8-13 age range, corrected for total brain volume and FSIQ. Blue regions indicate a significantly steeper negative slope in males than females. Corresponds to figure 5 in the main text (8-16 age range).

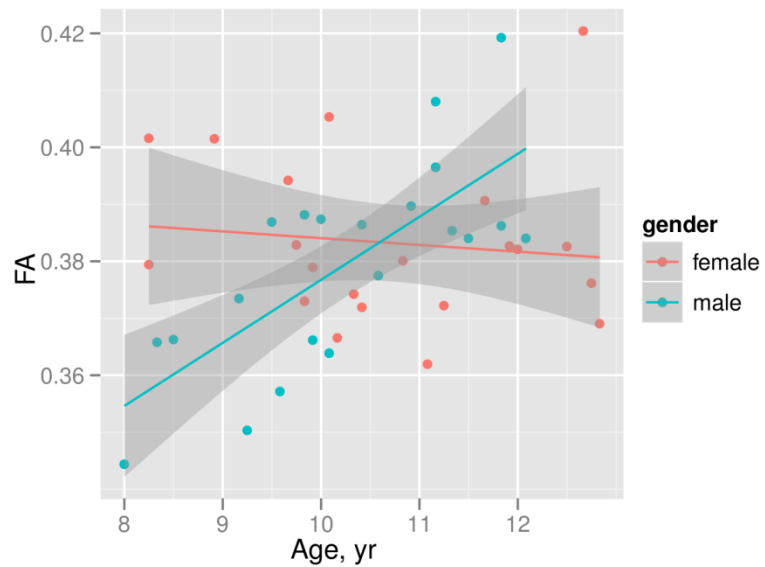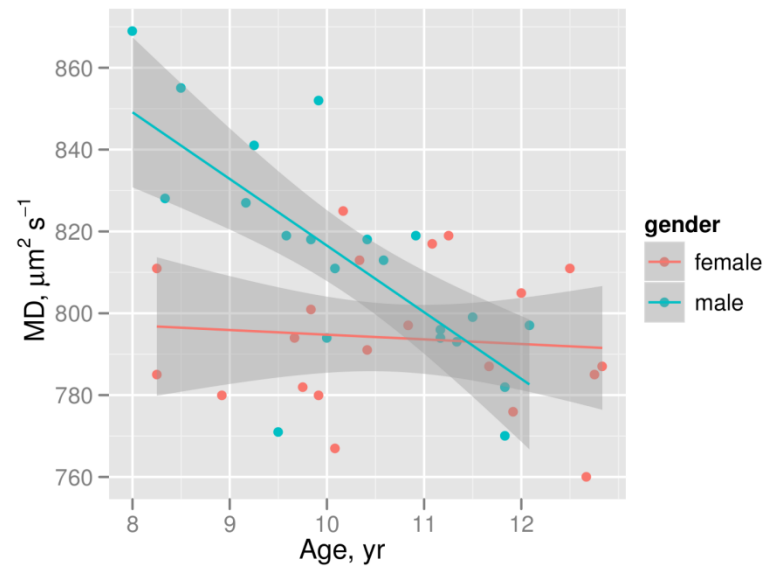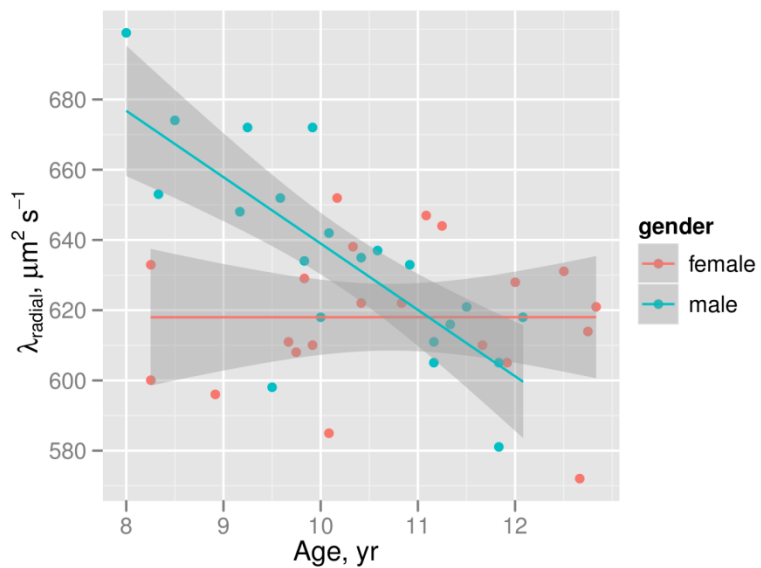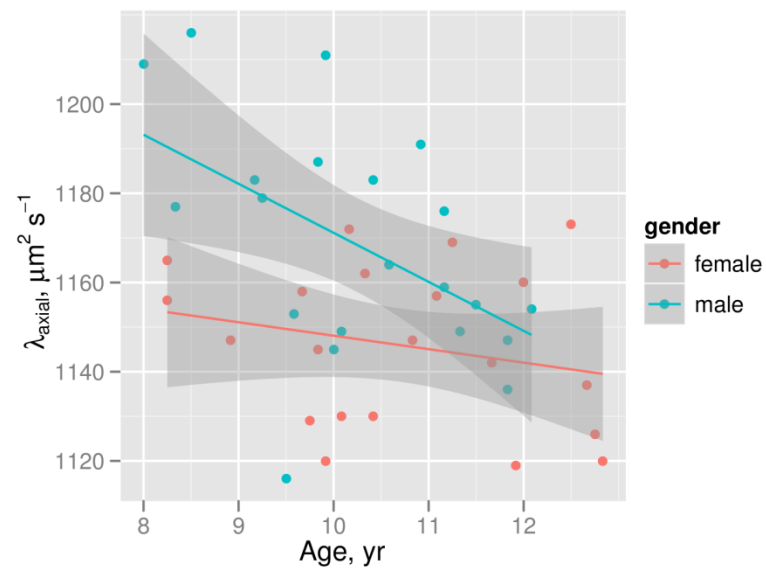

**Supplementary Figure 9:** Correlation between the mean value across the white matter skeleton for a) FA, b) MD, c)  $\lambda_{\text{radial}}$ , d)  $\lambda_{\text{axial}}$  with age for both males (blue) and females (red). Shaded area refers to the standard error on the fit. Corresponds to figure 6 in the main text (8-16 age range).

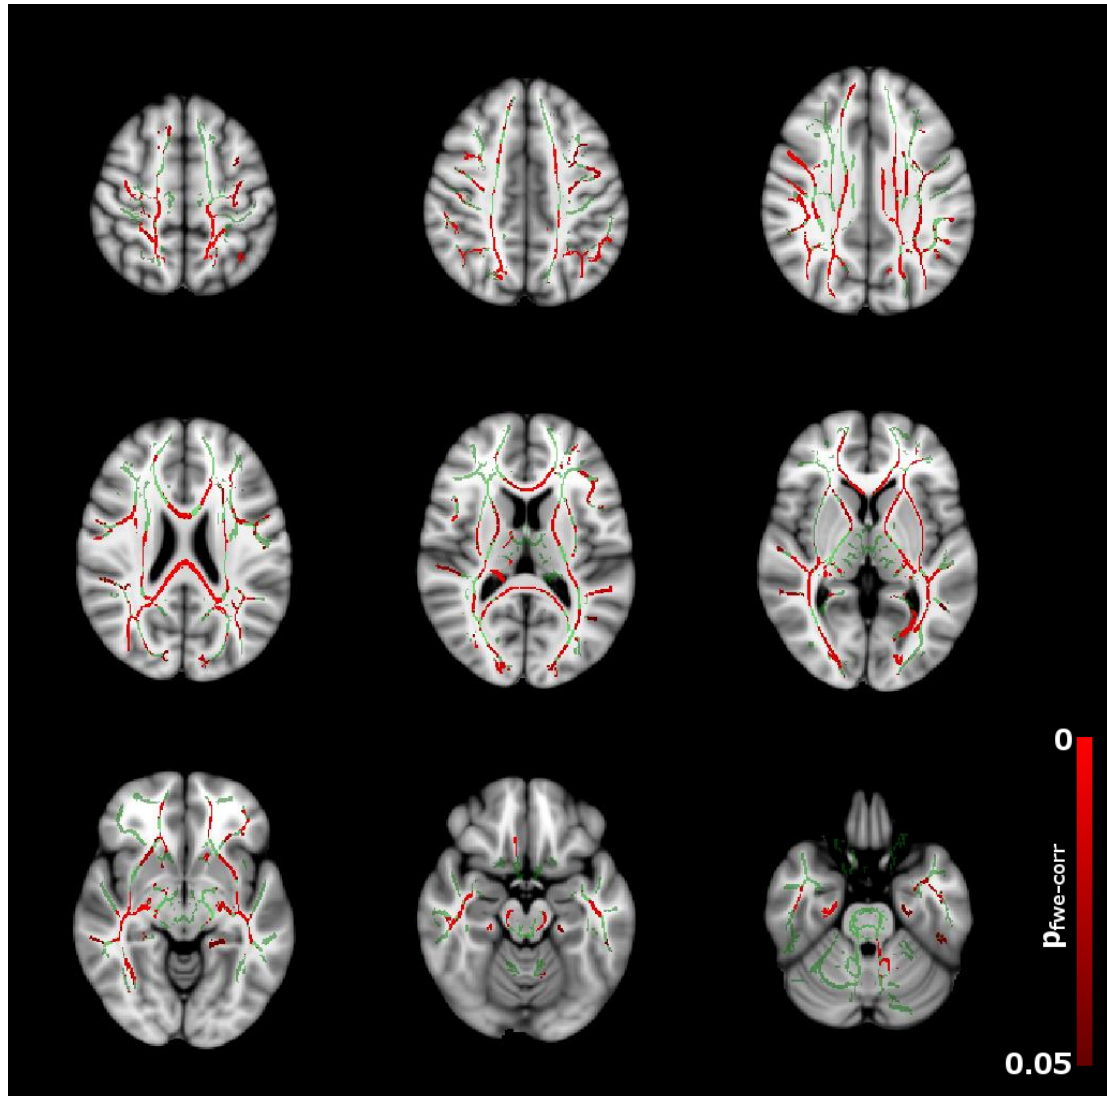

**Supplementary Figure 10:**

Correlation between FA and age for the male subjects ( $p < 0.05$ , corrected) in the 8-13 age range, corrected for FSIQ and total brain volume. Red regions indicate a significant increase in FA.

Corresponds to figure 7 in the main text (8-16 age range).



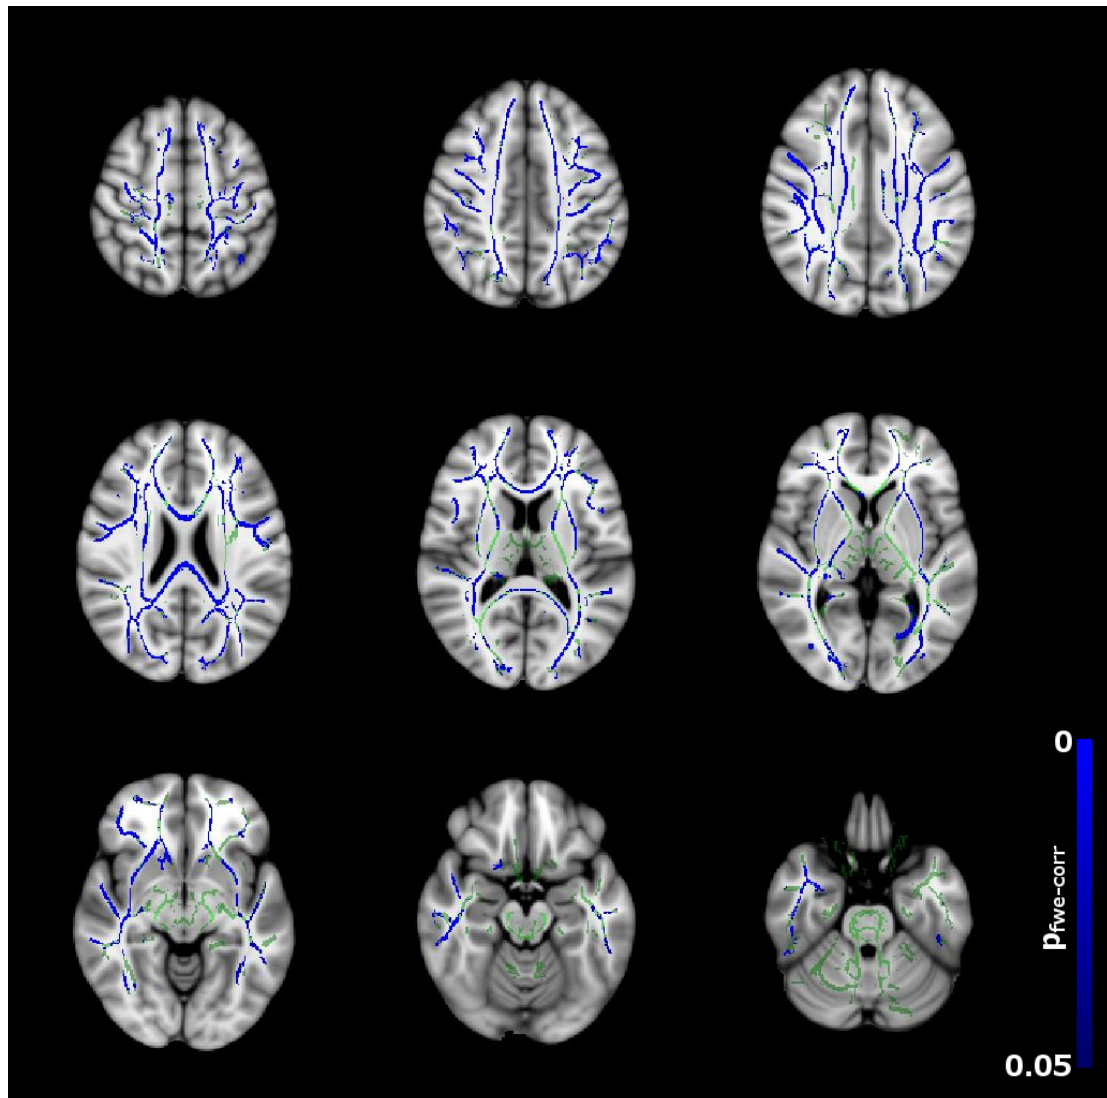

**Supplementary Figure 11:**

Correlation between MD and age for the male subjects ( $p < 0.05$ , corrected) in the 8-13 age range, corrected for FSIQ and total brain volume. Blue regions indicate a significant decrease in MD. Corresponds to figure 8 in the main text (8-16 age range).

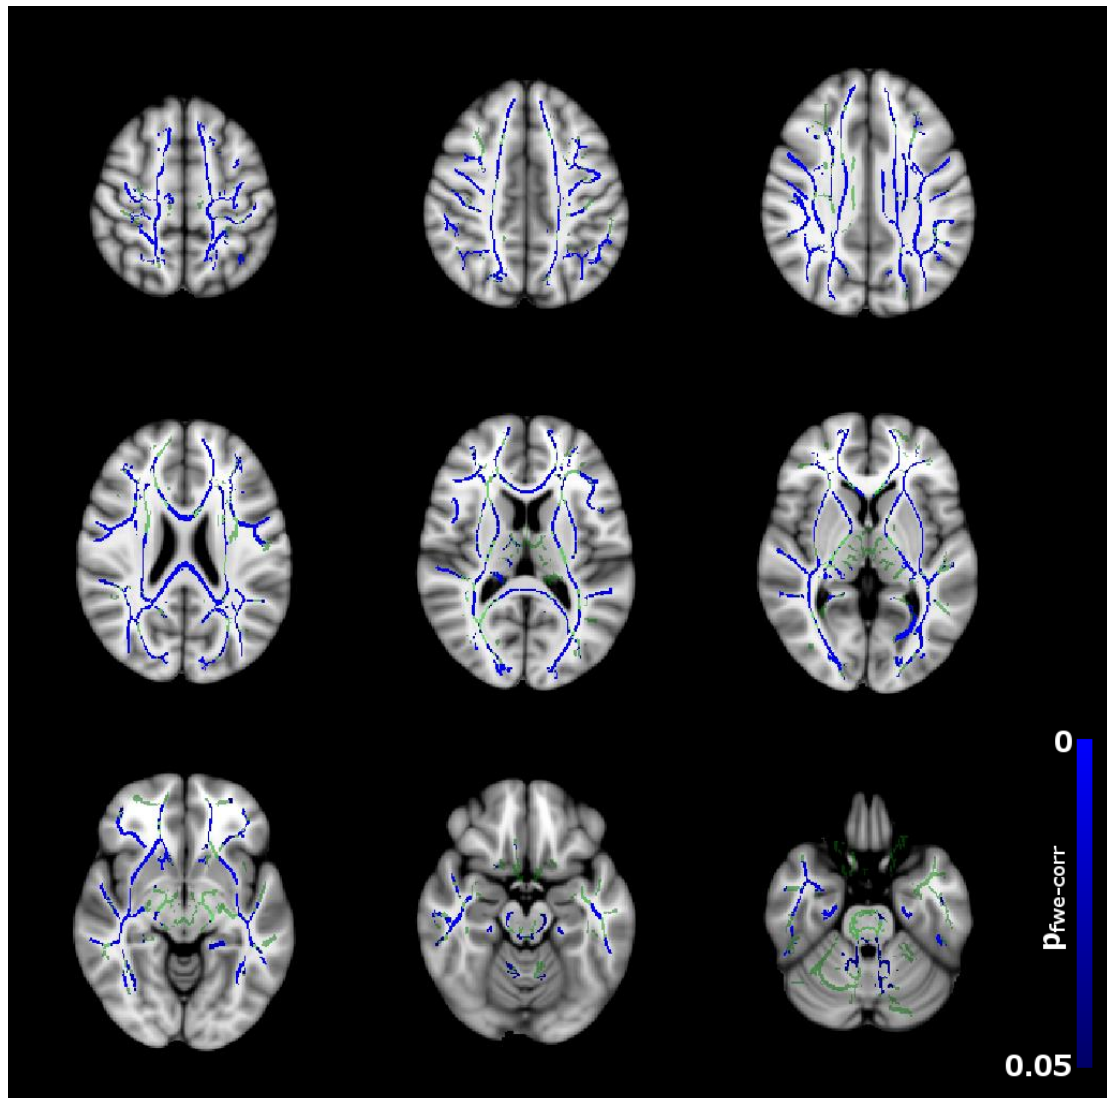

### Supplementary Figure 12:

Correlation between  $\lambda_{\text{radial}}$  and age for the male subjects ( $p < 0.05$ , corrected) in the 8-13 age range, corrected for FSIQ and total brain volume. Blue regions indicate a significant decrease in  $\lambda_{\text{radial}}$ . Corresponds to figure 9 in the main text (8-16 age range).
