# Supplementary material for: Sexual Dimorphism in White Matter Developmental Trajectories Using Tract-Based Spatial Statistics
Source: PubMed Central journal article supplement (PMC4744889; doi:10.1089/brain.2015.0340), 2016-02-01
Supplement: Supp_Figure3.pdf [file Supp_Figure3.pdf]

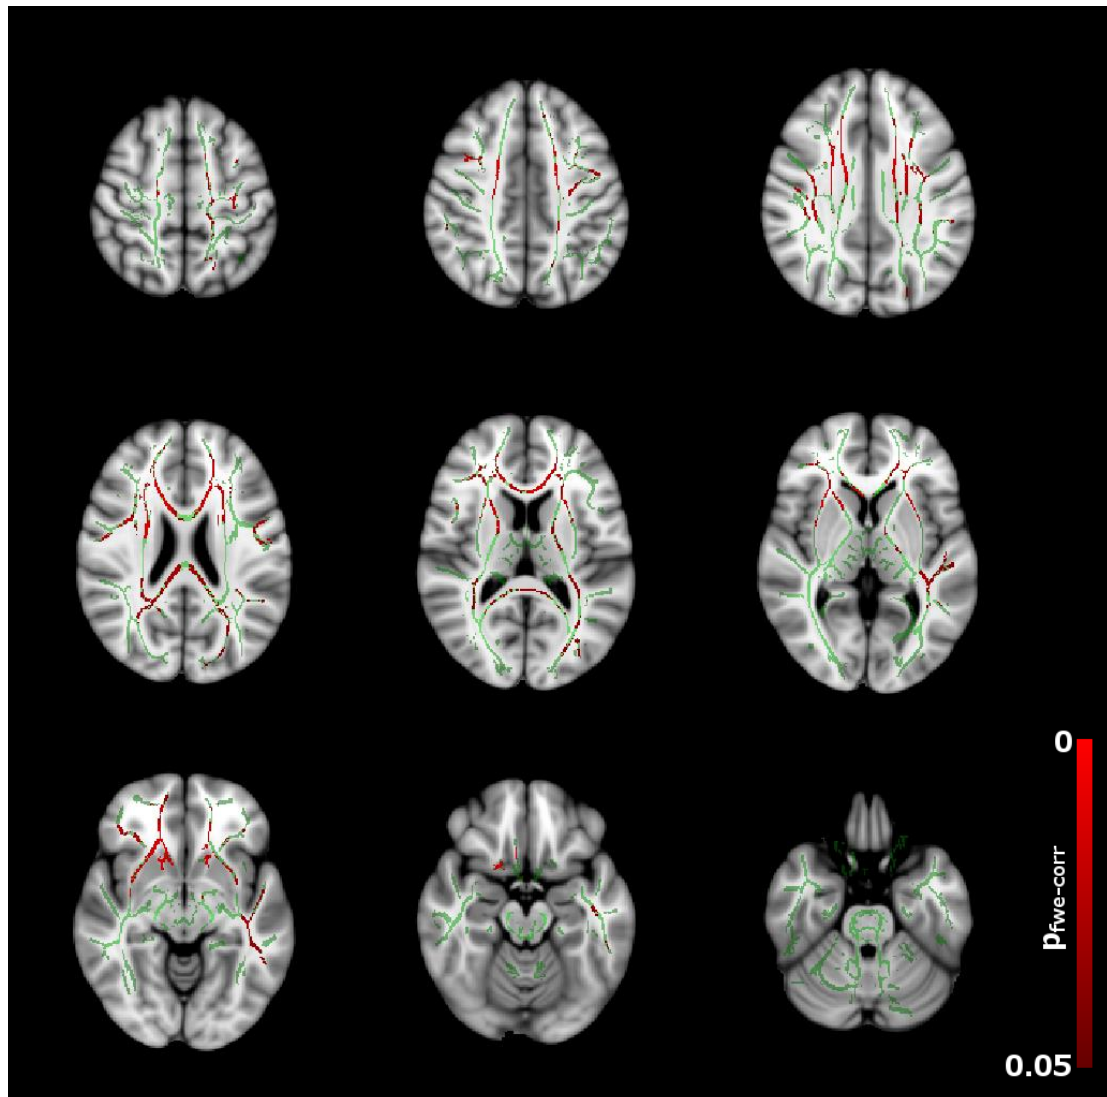

**Supplementary Figure 3:** Group differences in MD between male and female subjects ( $p < 0.05$ , corrected) in the 8-13 age range, corrected for age, total brain volume and FSIQ. Red regions indicate a significantly higher MD in males than females. Corresponds to figure 1 in the main text (8-16 age range).
