# Supplementary material for: Sexual Dimorphism in White Matter Developmental Trajectories Using Tract-Based Spatial Statistics
Source: PubMed Central journal article supplement (PMC4744889; doi:10.1089/brain.2015.0340), 2016-02-01
Supplement: Supp_Figure6.pdf [file Supp_Figure6.pdf]

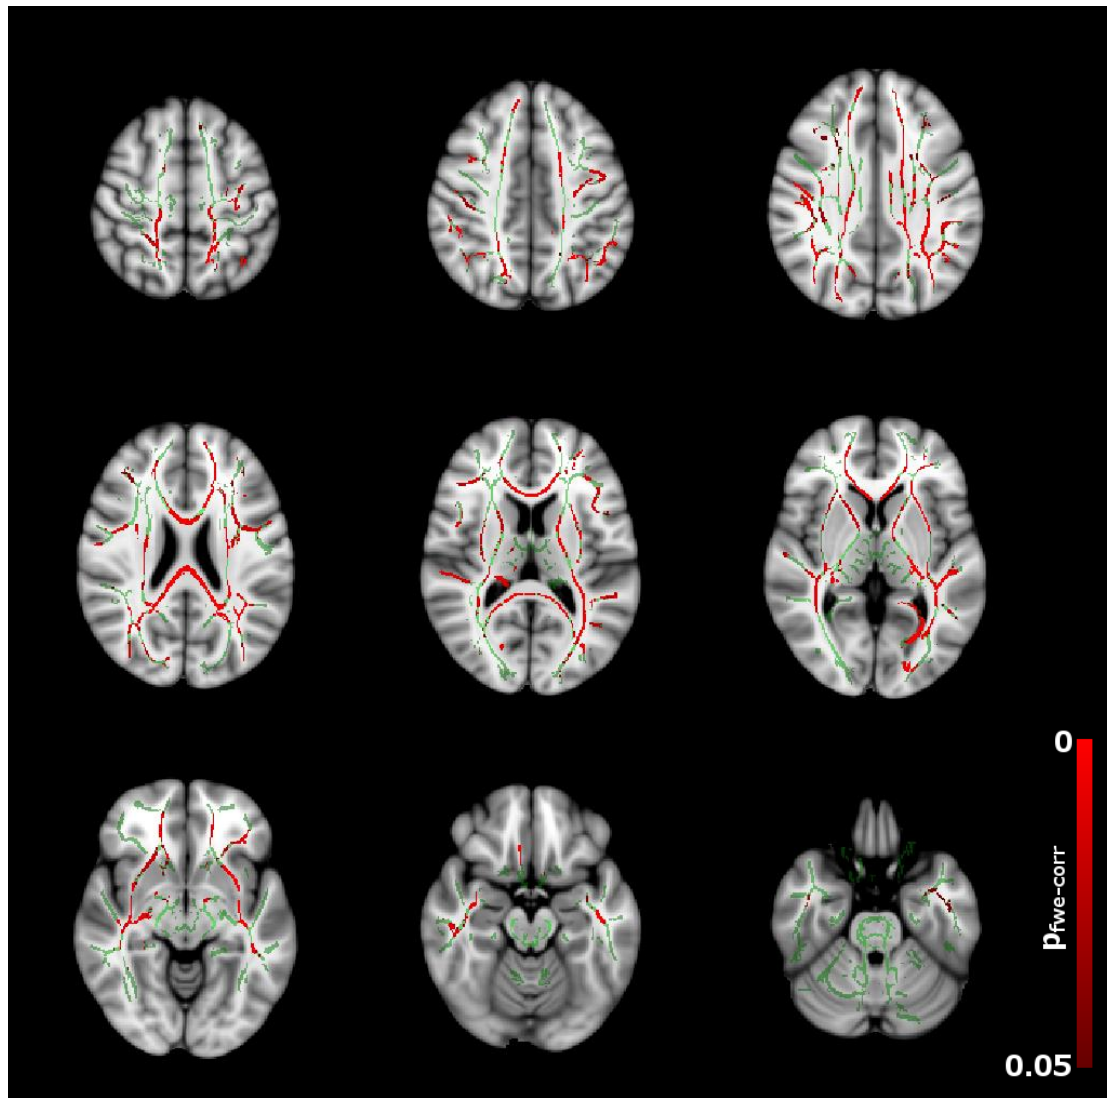

**Supplementary Figure 6:** Age-gender interactions in FA between male and female subjects ( $p < 0.05$ , corrected) in the 8-13 age range, corrected for total brain volume and FSIQ. Red regions indicate a significantly steeper slope in males than females. No significant difference was seen in the 8-16 age range, although several regions were close to significance ( $p < 0.1$ )
